# Supplementary material
Source: Springer Nature journal article supplement (https://www.springermedizin.de/resource/supplementary/13002_2010_212_MOESM1_ESM.pdf/9627456)

## Treatment seeking practices of Bhutanese people living in Thimphu

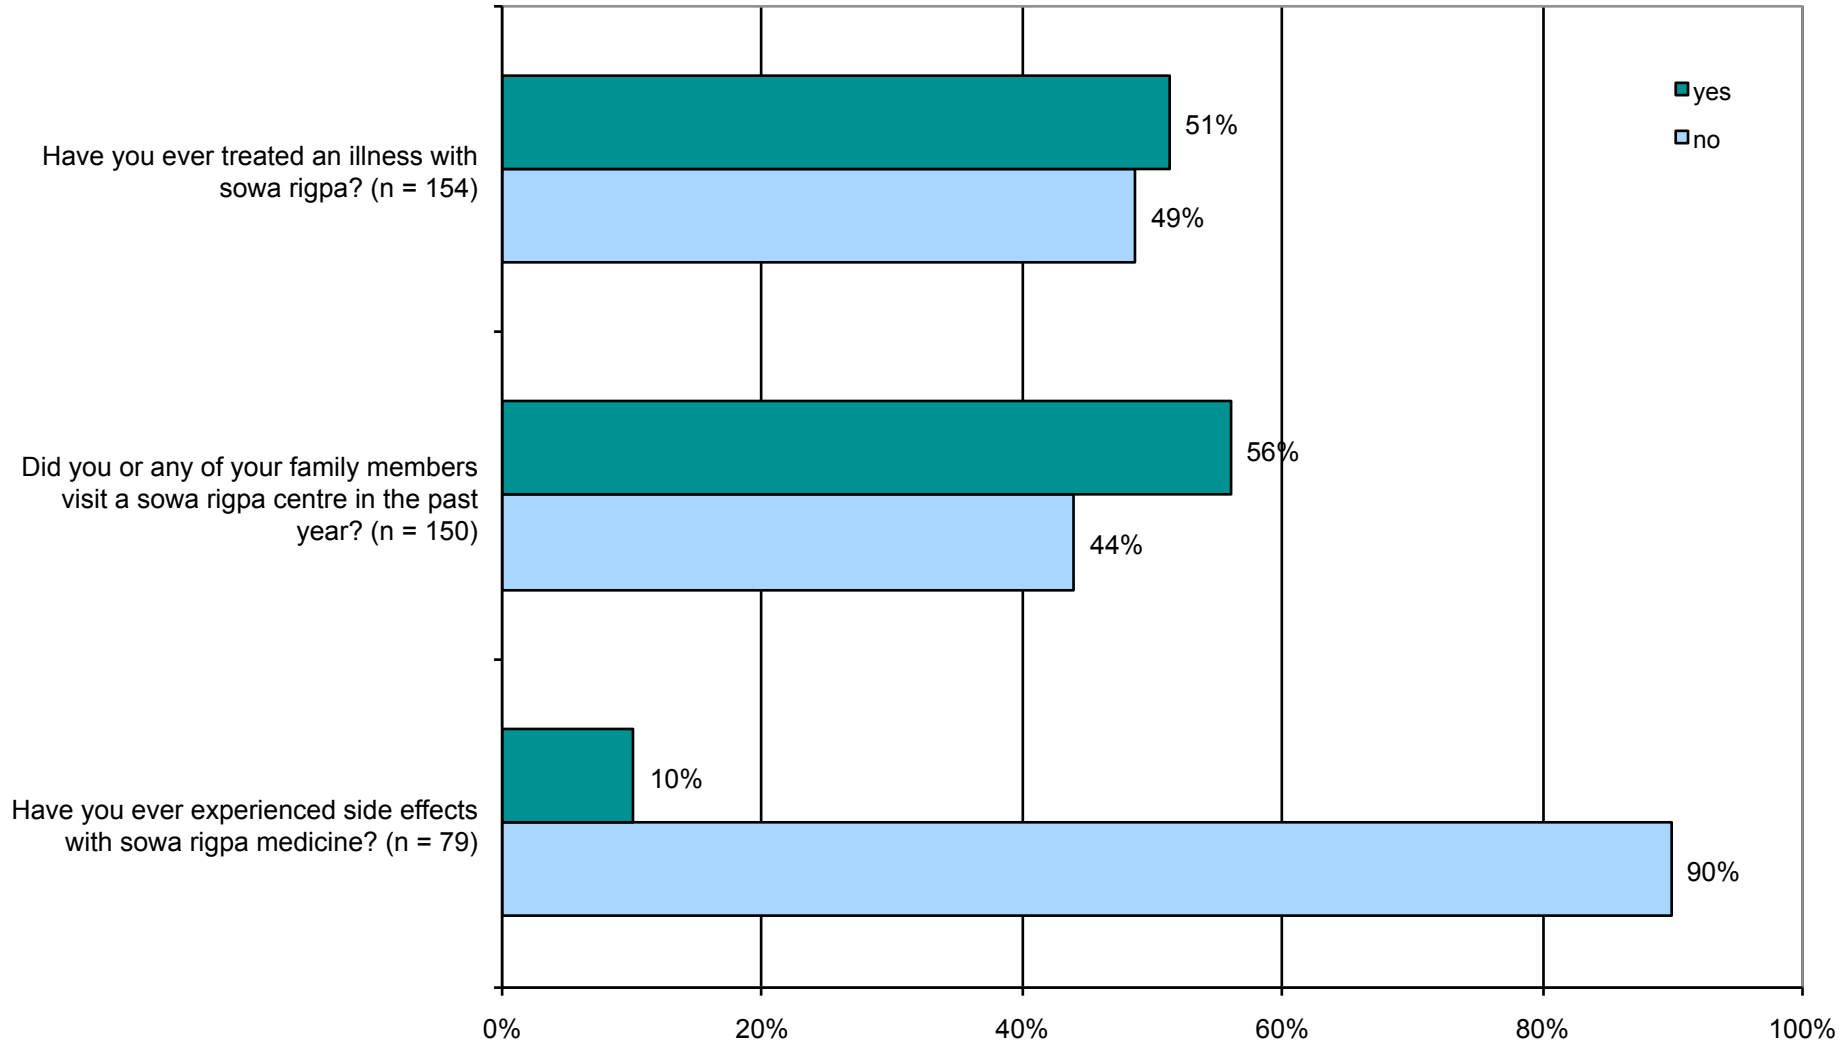

Supplement: MOESM1 [file 9627456]
